# Supplementary material
Source: PubMed Central journal article supplement (PMC4211446)
Supplement: rspb20141369supp1.pdf [file rspb20141369supp1.pdf]

# Supplementary Information for Manuscript "Turnover and accumulation of genetic diversity across large time-scale cycles of population isolation and connection"

Nicolas Alcalá<sup>1\*</sup>, Séverine Vuilleumier<sup>1,2</sup>

<sup>1</sup> Department of Ecology and Evolution, University of Lausanne, Biophore CH-1015 Lausanne, Switzerland

<sup>2</sup> Institute of Microbiology, Lausanne University Hospital and University of Lausanne, CH-1011 Lausanne, Switzerland

\* corresponding author: [Nicolas.Alcala@unil.ch](mailto:Nicolas.Alcala@unil.ch)

## Supplementary Material S1: Solution to the equations describing the genetic diversities within a period of isolation or connection

In this section, we derive the solution to the recurrence equations describing the dynamics of within- and between-population genetic diversities using the equations describing corresponding identities from [1] (p. 64).

From [1], within- and between-population genetic identities at generation  $P + 1$ ,  $f_s(P + 1)$  and  $f_b(P + 1)$ , follow:

$$\begin{cases} f_s(P + 1) = (1 - \mu)^2 [a(c + (1 - c)f_s(P)) + (1 - a)f_b(P)] \\ f_b(P + 1) = (1 - \mu)^2 [b(c + (1 - c)f_s(P)) + (1 - b)f_b(P)] \end{cases} \quad (\text{S1.1})$$

where  $a$ ,  $b$  and  $c$  are described in the main text (equations 3b-d). When  $m > 0$  (resp.  $m = 0$ ), equations S1.1 describe the dynamics of genetic identities during a connection period (resp. isolation period).

From S1.1, we can write the equations describing the dynamics of genetic diversities during isolation and connection periods, using the relationship  $h = 1 - f$ ,  $h_s(P) = 1 - f_s(P)$  and  $h_b(P) =$

23  $1 - f_b(P)$ , and denoting  $\mathbf{H}_c(P)$  and  $\mathbf{H}_i(P)$  the genetic diversities vector  $\mathbf{H}(P) = \begin{pmatrix} h_s(P) \\ h_b(P) \end{pmatrix}$   
 24 during connection ( $m > 0$ ) and isolation periods ( $m = 0$ ), respectively. We obtain:

$$\mathbf{H}_c(P + 1) = \mathbf{A}_c \mathbf{H}_c(P) + \mathbf{B}_c \quad (\text{S1.2a})$$

25

$$\mathbf{H}_i(P + 1) = \mathbf{A}_i \mathbf{H}_i(P) + \mathbf{B}_i \quad (\text{S1.2b})$$

26 where  $\mathbf{B}_c = (1 - \mu)^2 \begin{pmatrix} 1 - ac \\ 1 - bc \end{pmatrix}$ ,  $\mathbf{B}_i = (1 - \mu)^2 \begin{pmatrix} 1 - c \\ 1 \end{pmatrix}$  and  $\mathbf{A}_c$  and  $\mathbf{A}_i$  are defined in the  
 27 main text (equations 3a and 4).

28 Equations S1.2a and S1.2b are both inhomogenous matrix difference equations. As matrix  
 29  $(I - \mathbf{A}_c)$  (resp.  $(I - \mathbf{A}_i)$ ) is invertible, equation S1.2a (resp. S1.2b) has an equilibrium value,  
 30  $\hat{\mathbf{H}}_c = (I - \mathbf{A}_c)^{-1} \mathbf{B}_c$  (resp.  $\hat{\mathbf{H}}_i = (I - \mathbf{A}_i)^{-1} \mathbf{B}_i$ ). Also, equations S1.2a and S1.2b each have a  
 31 solution, which are presented in the main text equation 2.

## 32 **Supplementary Material S2: The dynamics of genetic diversities across** 33 **cycles under the panmictic connection periods approximation**

34 In this section, we derive dynamics of the genetic diversities under cycles of connection and isola-  
 35 tion in the case where populations are panmictic during the connection periods (i.e.,  $m = \frac{n-1}{n}$ ). We  
 36 demonstrate that genetic diversity changes monotonically across cycles; in addition, we show that  
 37 the relaxation time of genetic diversity when periods are short correspond to that under constant  
 38 migration.

39 In this case, matrix  $\mathbf{A}_c$  simplifies to:

$$\mathbf{A}_c = (1 - \mu)^2 \begin{pmatrix} \frac{1}{n}(1 - c) & \frac{n-1}{n} \\ \frac{1}{n}(1 - c) & \frac{n-1}{n} \end{pmatrix} \quad (\text{S2.1})$$

40 and its eigenvalues simplify to:

$$\begin{aligned} \lambda_1 &= (1 - \mu)^2(1 - c') \\ \lambda_2 &= 0 \end{aligned} \quad (\text{S2.2})$$

41 where  $c' = 1/2nN$  is the rate of genetic drift in a panmictic population of size  $nN$ .

42 Consequently,

$$\Gamma_c = (1 - \mu)^{4P} (1 - c')^{P-1} \begin{pmatrix} \frac{1}{n}(1 - c)^{P+1} & \frac{n-1}{n} \\ \frac{1}{n}(1 - c)^{P+1} & \frac{n-1}{n} \end{pmatrix} \quad (\text{S2.3})$$

43 with a first eigenvalue  $\lambda_c = (1 - \mu)^{4P} (1 - c')^{P-1} (\frac{1}{n}(1 - c)^{P+1} + \frac{n-1}{n})$ , and a second eigenvalue which  
 44 is null. Therefore, the changes of genetic diversity across cycles are monotonic, and in particular,  
 45 the successive peaks of genetic diversity generated by connection events have a monotonically  
 46 changing size.

47 So we have, for  $k \geq 1$ :

$$h_{c,s}^{(k)} = h_{c,b}^{(k)} = \lambda_c^k \left( \frac{\frac{1}{n}(1 - c)^{P+1} h_s^{(0)} + \frac{n-1}{n} h_b^{(0)}}{\frac{1}{n}(1 - c)^{P+1} + \frac{n-1}{n}} - h_c^* \right) + h_c^* \quad (\text{S2.4})$$

48 where  $h_c^*$  is the equilibrium value of the cycles both within- and between-population.

49 Interestingly, when  $P$  tends to 0 the relaxation time of  $h_{c,s}$  and  $h_{c,b}$ ,  $\log(\delta)/\log(\lambda_c)$ , tends to  
 50 the expected relaxation time during connection,  $P_C$  (equation 10). This demonstrates that when  
 51 periods are short, the relaxation time is approximately the same as under constant migration.

## 52 Supplementary Material S3: Dynamics of genetic diversity under 53 stochastic cycles of isolation and connection

54 We showed that values of  $P$ ,  $P_W$  and  $P_I$  determine the behavior of genetic diversity under cycles  
 55 of isolation and connection. In this section, we consider that each period  $P$  is a random variable.

56 We study the two following quantities: the probabilities that the isolation period is shorter than  
 57  $P_W$ ,  $\mathbb{P}(P < P_W)$ , and the probability that it is longer than  $P_I$ ,  $\mathbb{P}(P > P_I)$ . Two scenarios are  
 58 considered. Scenario **A** assumes that the probability of an event of isolation (resp. connection)  
 59 is the same for each generation (i.e. independent of the generation  $t$ ) but follows a geometric  
 60 distribution. Scenario **B** assumes that the length of isolation and connection periods are regular  
 61 but have a Gaussian noise, generating variance around the mean period  $P$  (i.e. dependent of the  
 62 generation  $t$ ). Thus, Scenario A considers time-homogeneous stochastic changes and Scenario B

63 considers time-inhomogeneous stochastic changes (following [2]).

## 64 Dynamics of genetic diversity under scenario A

65 Under scenario A, we assume that the probability  $p$  to switch from isolation state to connection state  
66 at a given generation is independent of the current generation  $t$ . Thus, the sequence of isolation  
67 and connection events is modelled as a two states time-homogeneous Markov process. Under such  
68 a scenario, the duration of each period (corresponding to the waiting time until state switch),  $P$ ,  
69 follows a geometric distribution of parameter  $p$ ,  $p$  being the probability of the occurrence of the  
70 isolation or connection event (so the mean period is  $\bar{P} = 1/p$ ). Thus we have:

$$\begin{cases} \mathbb{P}(P < P_W) = 1 - (1 - p)^{P_W} \\ \mathbb{P}(P > P_I) = (1 - p)^{P_I} \end{cases} \quad (\text{S3.1})$$

71 Which yields

$$\begin{cases} \mathbb{P}(P < P_W) > 1 - \epsilon_W \Leftrightarrow p > 1 - \epsilon_W^{1/P_W} \\ \mathbb{P}(P > P_I) > 1 - \epsilon_I \Leftrightarrow p < 1 - (1 - \epsilon_I)^{1/P_I} \end{cases} \quad (\text{S3.2})$$

72 Where  $\epsilon_W$  and  $\epsilon_I$  correspond to the probability that a random period  $P$  is larger than  $P_W$  and lower  
73 than  $P_I$ , respectively. Values of  $\epsilon_W$  and  $\epsilon_I$  close to 0 lead to a behavior of genetic diversities that  
74 follows what is expected under the short-period and long-period domains, respectively.

75 Using the expression of  $P_W$  and  $P_I$  from equations 10 and 11, we obtain the following approx-  
76 imation for conditions (S3.2):

$$\begin{cases} \mathbb{P}(P < P_W) > 1 - \epsilon_W \Leftrightarrow p > (1/2N + 2\mu) \frac{\log(\epsilon_W)}{\log(1 - \alpha)} \\ \mathbb{P}(P > P_I) > 1 - \epsilon_I \Leftrightarrow p < 2\mu \frac{\log(1 - \epsilon_I)}{\log(\alpha)} \end{cases} \quad (\text{S3.3})$$

77 Where  $\alpha$  is a value that determines the difference between genetic diversity during the isolation  
78 period and the expected genetic diversity in equilibrium isolated populations (by default, we use  
79  $\alpha = 0.05$ ).

80 From equation S3.3, it is interesting to see that the values of probability  $p$  which determine  
81 the shape of the equilibrium trajectory are approximately linear functions of  $1/2N$  and  $\mu$ . Thus,

82 as population size,  $N$ , increases, the probability that the trajectories of genetic diversity belong  
 83 to the short-period domain increases. Similarly, as mutation decreases,  $\mu$ , the probability that the  
 84 trajectories of genetic diversity belong to the short-period domain increase and the probability that  
 85 they belong to the large-period domain decreases. Numerical simulations confirm that when con-  
 86 ditions from equation S3.3 are met, under scenario A, the genetic diversity reaches the equilibrium  
 87 trajectory predicted under deterministic periods of isolation and connection, even though periods  
 88 are stochastic (see figure S3.1).

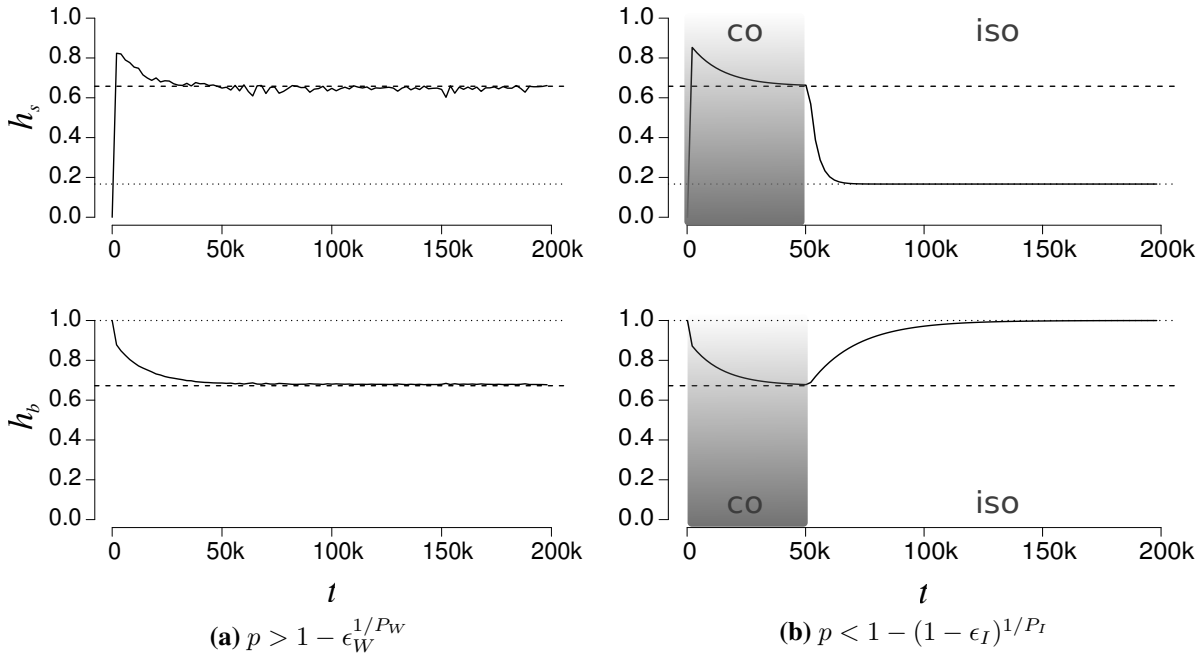

**Figure S3.1** Illustration of the impact of stochastic period length (scenario A, geometric distribution of parameter  $p$ ) on the trajectories of within- ( $h_s$ ) and between-population ( $h_b$ ) genetic diversities during cycles of isolation and connection considering (a) short and (b) long expected periods  $\mathbb{E}[P] = 1/p$ . The dashed and dotted lines represent the expected equilibrium value when populations are connected and isolated, respectively. In (a),  $p > 1 - \epsilon_W^{1/P_W}$  (expected short-periods) and both  $h_s$  and  $h_b$  tend to the connection equilibrium (dashed line). In (b),  $p < 1 - (1 - \epsilon_I)^{1/P_I}$  (expected long-periods) and genetic diversities reach their expected equilibrium value at the end of each connection period and isolation period. Parameters are  $M = 40$ ,  $n = 10$ ,  $N = 2,000$ ,  $\mu = 2.5 \times 10^{-5}$ ,  $\epsilon_W = \epsilon_I = 0.05$ . (a)  $p = 0.02$  ( $\mathbb{E}[P] = 50$ ), (b)  $p = 5.10^{-7}$  ( $\mathbb{E}[P] = 2.10^6$ ).

## 89 Dynamics of genetic diversity under scenario B

90 Under scenario B, the period  $P$  follows a truncated normal distribution (between 0 and  $\infty$ ). The  
 91 period of the fluctuations  $P$  (i.e. the waiting time until a switch from one state to another) follows

92 a discretized normal distribution of mean  $\bar{P}$  and variance  $\sigma^2$ :

$$f(P = t) = \begin{cases} \frac{K}{\sigma\sqrt{2\pi}} e^{-\frac{(t-\bar{P})^2}{2\sigma^2}} & \text{if } t > 0 \\ 0 & \text{else} \end{cases} \quad (\text{S3.4})$$

93 where  $K = \sum_{t=0}^{+\infty} f(P=t)$  is a normalization constant taking into account the truncation and dis-  
94 cretization of the distribution of  $P$ .

95 We can show that this distribution of waiting time corresponds to a time-inhomogeneous Markov  
96 process with two states (isolation and connection), and derive the corresponding transition probab-  
97 ities  $p(t)$  as a function of time  $t$ . Indeed, starting from a given state (either connection or isolation),  
98 the distribution of  $P$  is linked to the transition probabilities  $p(t)$  through the relation:

$$f(P = t) = (1 - p(1))(1 - p(2))\dots(1 - p(t - 1))p(t) \quad (\text{S3.5})$$

99 From equation S3.4 and S3.5, we have:

$$p(0) = f(P = 0) = \frac{K}{\sigma\sqrt{2\pi}} e^{-\frac{\bar{P}^2}{2\sigma^2}} \quad (\text{S3.6})$$

100 In addition, from equations S3.4 and S3.5, we have:

$$p(t + 1) \frac{1 - p(t)}{p(t)} = \frac{f(P = t + 1)}{f(P = t)} = e^{-\frac{-2(t-\bar{P})-1}{2\sigma^2}} \quad (\text{S3.7})$$

101 which yields

$$p(t + 1) = \frac{p(t)}{1 - p(t)} e^{-\frac{-2(t-\bar{P})-1}{2\sigma^2}} \quad (\text{S3.8})$$

102 Using equation S3.8 recursively, starting from the expression of  $p(0)$  given in equation S3.6, leads  
103 to all values of  $p(t)$ .

104 Assuming that the probabilities,  $\epsilon_W$  and  $\epsilon_I$ , that the period  $P$  is lower than  $P_W$  and larger than  
105  $P_I$  are small, respectively (i.e.,  $\epsilon_W = \epsilon_I = 0.05$ ) and using the 5% and 95% quantiles of a normal

106 distribution of parameters  $\bar{P}$  and  $\sigma$  ( $\bar{P} - 1.64\sigma$  and  $\bar{P} + 1.64\sigma$ , respectively) we have:

$$\begin{cases} \mathbb{P}(P < P_W) > 1 - \epsilon_W \Leftrightarrow \bar{P} + 1.64\sigma < P_W \\ \mathbb{P}(P > P_I) > 1 - \epsilon_I \Leftrightarrow \bar{P} - 1.64\sigma > P_I \end{cases} \quad (\text{S3.9})$$

107 Interestingly, we can see from equation S3.9 that for a given  $\bar{P}$ , increasing  $\sigma$  decreases the probabil-  
 108 ity to reach the short-period domain and the intermediate-period domain, as then  $\bar{P} + 1.64\sigma$  (resp.  
 109  $\bar{P} - 1.64\sigma$ ) becomes closer and possibly larger than  $P_W$  (resp. smaller than  $P_I$ ). The gaussian  
 110 noise does not change the qualitative behavior of genetic diversity through the cycles of isolation  
 111 and connection (including the equilibrium trajectory) when conditions from equation S3.9 are met  
 112 (see figure S1).

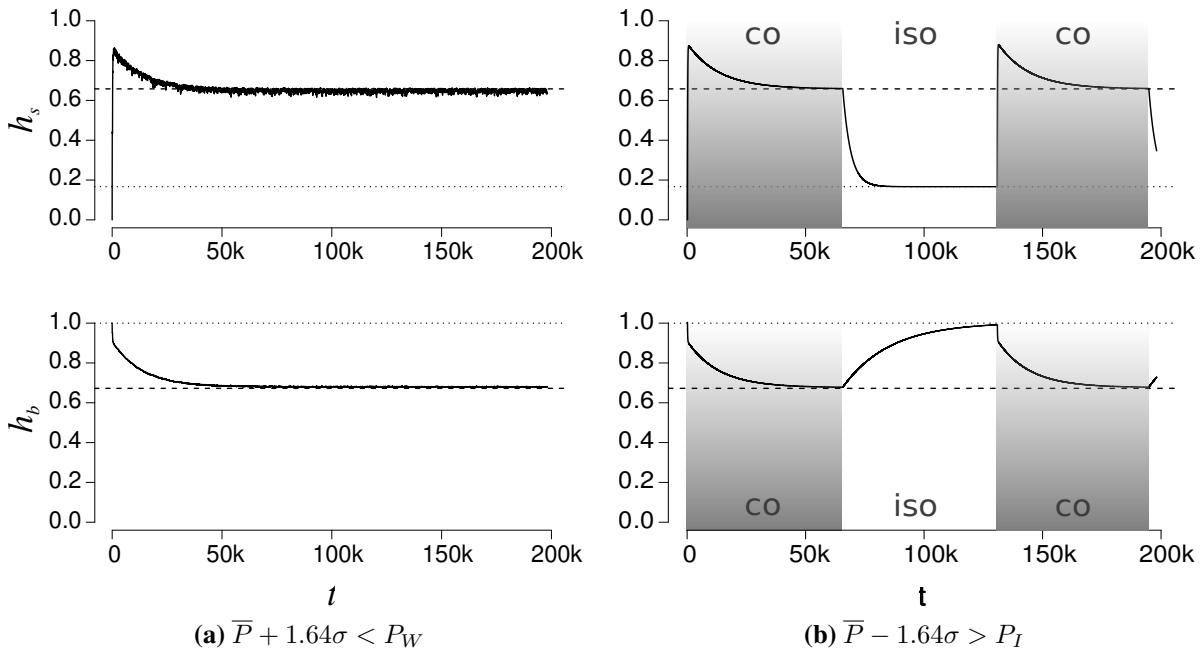

**Figure S3.2** Illustration of the impact of stochastic period length (scenario B, duration following a normal distribution of mean  $\bar{P}$  and standard deviation  $\sigma$ ) on the within- ( $h_s$ ) and between-population ( $h_b$ ) genetic diversities during cycles of isolation and connection. The dashed and dotted lines represent the expected value at equilibrium when populations are connected and isolated, respectively. In (a),  $\bar{P} + 1.64\sigma < P_W$  (expected short-periods), both  $h_s$  and  $h_b$  tend to the connection equilibrium (dashed line). In (b),  $\bar{P} - 1.64\sigma > P_I$  (expected long-periods), genetic diversities reach their expected equilibrium value at the end of each connection period and isolation period. Parameters are  $M = 40$ ,  $n = 10$ ,  $N = 2,000$ ,  $\mu = 2.5 \times 10^{-5}$ . (a)  $\bar{P} = 100$ ,  $\sigma = 50$  (b)  $\bar{P} = 65,000$ ,  $\sigma = 1,000$ .

113 **LITERATURE CITED**

114 [1] Crow, J. F., 1986 *Basic concepts in population, quantitative, and evolutionary genetics*. WH  
115 Freeman and Company.

116 [2] Tuljapurkar, S., 1989 An uncertain life: demography in random environments. *Theoretical*  
117 *population biology* **35**, 227–294.



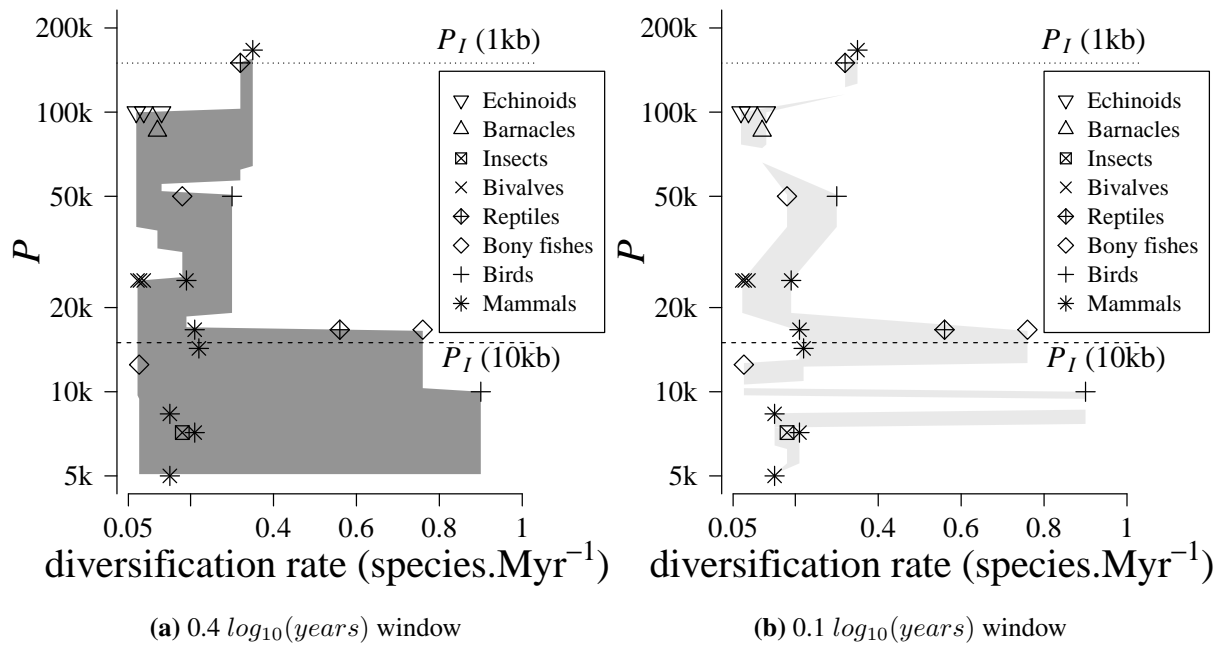

**Figure S1** Impact of the window size on the estimated range of diversification rates (shaded area), as a function of the period length  $P$ , for species representative of the main animal orders experiencing environmental cycles of period 100,000 years. (a) Sliding windows of size  $0.4 \log_{10}(\text{years})$ ; (b) Sliding windows of size  $0.1 \log_{10}(\text{years})$ . Correlations between  $P$  and diversification rate are significant in both (a) and (b) (Spearman's test).
